# Supplementary material
Source: MDPI journal article supplement (https://www.mdpi.com/2073-4344/11/4/514)
Supplement: s1 [file s1]

## Supplementary Material

# Magnetite-Based Catalyst in the Catalytic Wet Peroxide Oxidation for Different Aqueous Matrices Spiked with Naproxen–Diclofenac Mixture

Ysabel Huacallo-Aguilar <sup>1</sup>, Silvia Álvarez-Torrellas <sup>1,\*</sup>, Johanny Martínez-Nieves <sup>1</sup>, Jonathan Delgado-Adámez <sup>2</sup>, María Victoria Gil <sup>3</sup>, Gabriel Ovejero <sup>1</sup> and Juan García <sup>1,\*</sup>

<sup>1</sup> Grupo de Catálisis y Procesos de Separación (CyPS), Departamento de Ingeniería Química y de Materiales, Facultad de ciencias Químicas, Universidad Complutense, Avda. Complutense s/n, 28040 Madrid, Spain; Ysabelhu@ucm.es (Y.H.-A.); johannymartinezn@gmail.com (J.M.); govejero@ucm.es (G.O.)

<sup>2</sup> Chemical Technological Institute of Food and Agriculture (INTAEX), Centro de Investigaciones Científicas y Tecnológicas de Extremadura (CICYTEX), Avda. Adolfo Suárez s/n, 06007 Badajoz, Spain; jonathan.delgado@juntaex.es

<sup>3</sup> IACYS-Unidad de Química Verde y Desarrollo Sostenible, Departamento de Química Orgánica e Inorgánica, Facultad de Ciencias, Universidad de Extremadura, 06006 Badajoz, Spain; vgil@unex.es

\* Correspondence: satorrellas@ucm.es (S.Á.-T.); jgarciar@ucm.es (J.G.); Tel.: +34-913944118

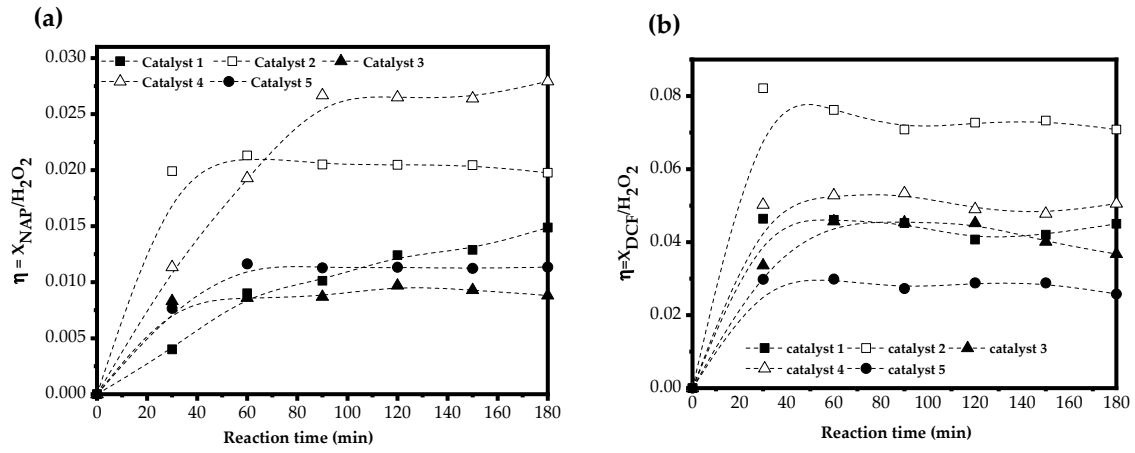

**Figure 1.** Hydrogen peroxide efficiencies on **(a)** NAP and **(b)** DCF degradation using the different catalyst. Reaction conditions:  $[NAP]_0 = [DCF]_0 = 5.0$  mg/L,  $[catalyst] = 1.0$  g/L,  $pH = 6.3$ ,  $1.5$  mM  $H_2O_2$  and  $70^\circ C$ . Atmospheric pressure and 3 h of reaction time.

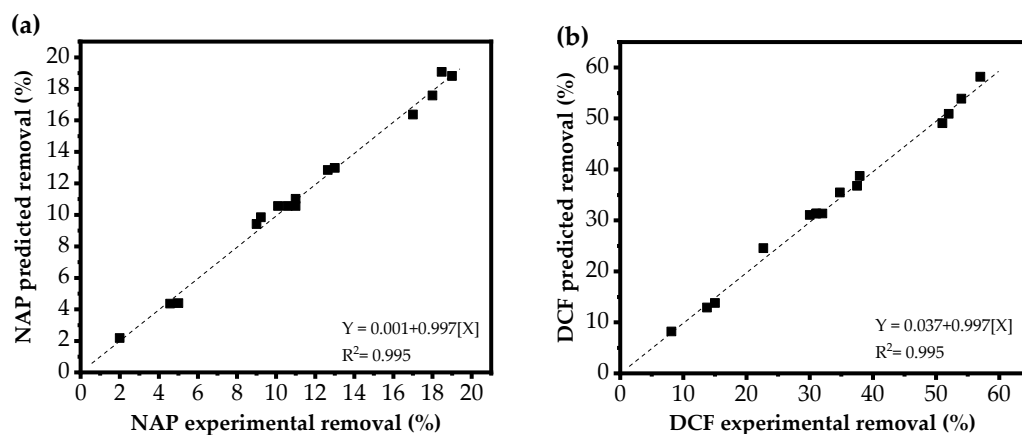

**Figure S2.** Linear correlation between the experimental and the predicted values of (a) NAP and (b) DCF removal efficiency. Reaction conditions:  $[NAP]_0 = [DCF]_0 = 5.0$  mg/L,  $[catalyst] = 1.0$  g/L. Atmospheric pressure and 3 h of reaction time.

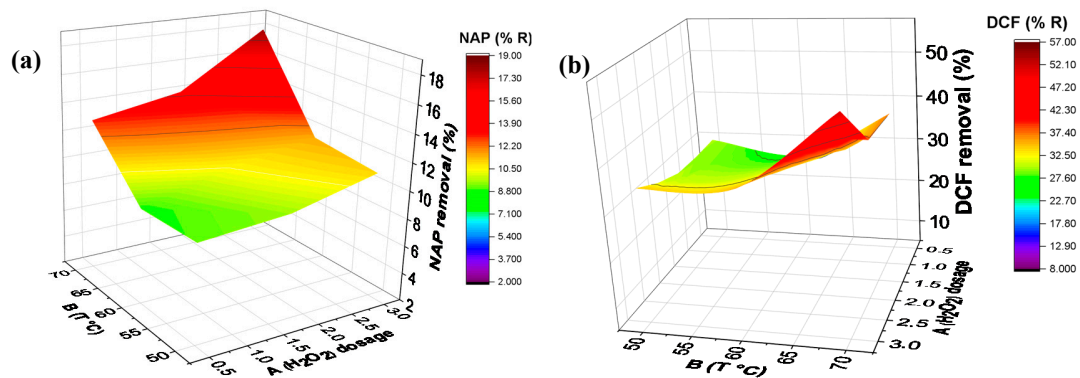

**Figure S3.** Combined effect of temperature and  $\text{H}_2\text{O}_2$  on the removal of (a) NAP and (b) DCF. Reaction conditions:  $[\text{NAP}]_0 = [\text{DCF}]_0 = 5.0 \text{ mg/L}$ ,  $[\text{catalyst}] = 1.0 \text{ g/L}$ , and atmospheric pressure and 3 h of reaction time.

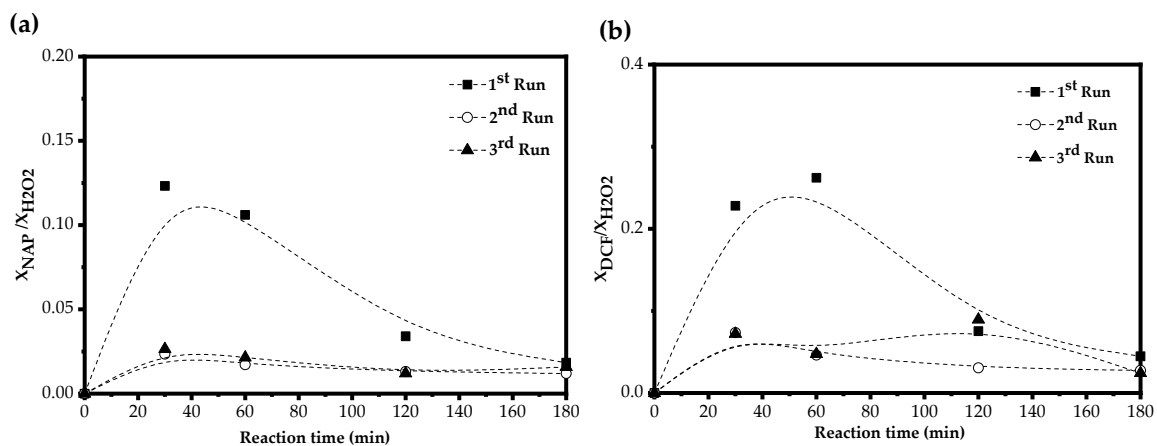

**Figure S4.** Hydrogen peroxide efficiencies on NAP and DCF degradation at optimal conditions. Reaction conditions:  $[\text{NAP}]_0 = [\text{DCF}]_0 = 5.0 \text{ mg/L}$ ,  $[\text{catalyst}] = 1.0 \text{ g/L}$ ,  $\text{pH} = 6.5$ ,  $3 \text{ mM H}_2\text{O}_2$  and  $50^\circ\text{C}$ . Atmospheric pressure and 3 h of reaction time.

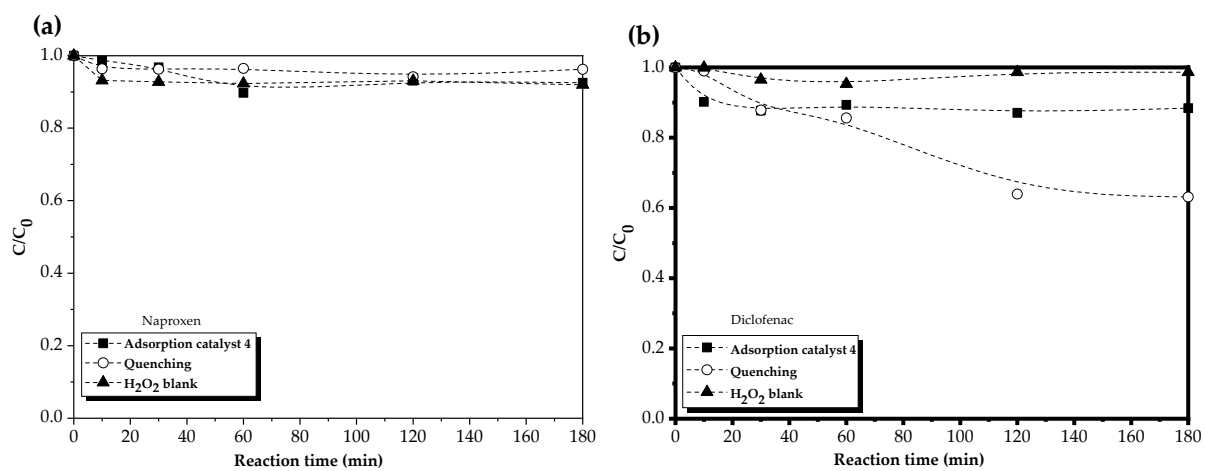

**Figure S5.** Adsorption blank with the catalyst 4,  $H_2O_2$  blank and quenching test of CWPO for a) NAP and b) DCF. Operating conditions:  $[NAP]_0 = [DCF]_0 = 5.0$  mg/L,  $[catalyst] = 1.0$  g/L, pH = 6.5, 3 mM  $H_2O_2$  and 50°C. Atmospheric pressure and 3 h of reaction time.

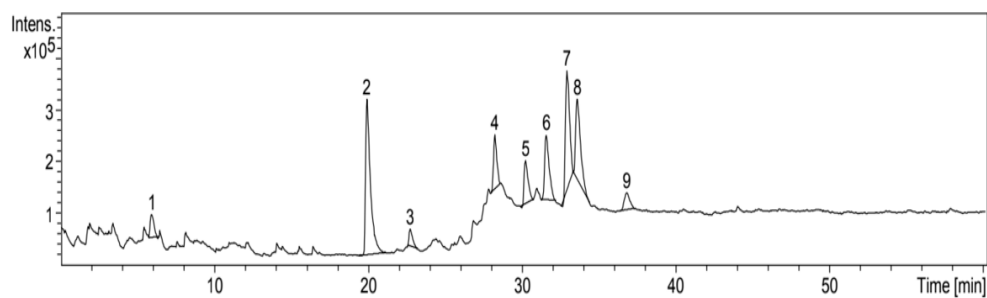

| # | RT [min] | Area    |
|---|----------|---------|
| 1 | 6.0      | 761796  |
| 2 | 19.9     | 6428387 |
| 3 | 22.7     | 501605  |
| 4 | 28.2     | 1542457 |
| 5 | 30.2     | 1449424 |
| 6 | 31.6     | 2508016 |
| 7 | 32.9     | 4235150 |
| 8 | 33.6     | 3452451 |
| 9 | 36.8     | 786092  |

#### Cmpd 1, 6.0 min

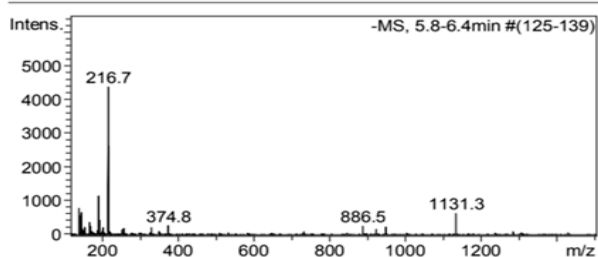

| #  | m/z    | I    |
|----|--------|------|
| 1  | 140.8  | 782  |
| 2  | 144.6  | 569  |
| 3  | 146.6  | 650  |
| 4  | 148.6  | 198  |
| 5  | 154.7  | 219  |
| 6  | 168.7  | 368  |
| 7  | 170.7  | 250  |
| 8  | 188.8  | 108  |
| 9  | 189.8  | 124  |
| 10 | 192.7  | 1140 |
| 11 | 194.7  | 420  |
| 12 | 202.6  | 140  |
| 13 | 204.6  | 209  |
| 14 | 216.7  | 4364 |
| 15 | 217.7  | 287  |
| 16 | 254.5  | 142  |
| 17 | 256.5  | 178  |
| 18 | 258.5  | 186  |
| 19 | 330.4  | 207  |
| 20 | 350.7  | 102  |
| 21 | 374.8  | 260  |
| 22 | 886.5  | 243  |
| 23 | 922.1  | 152  |
| 24 | 947.2  | 193  |
| 25 | 947.5  | 223  |
| 26 | 1131.3 | 627  |

**Figure S6.** Intermediaries' peaks between NAP (12) and DCF (16) identified in the treated CWPO sample.  
 Reaction conditions: [NAP]<sub>0</sub> = [DCF]<sub>0</sub> = 5.0 mg/L, [catalyst<sub>4</sub>] = 1.0 g/L, pH = 6.5, 3 mM H<sub>2</sub>O<sub>2</sub> and 50°C.  
 Atmospheric pressure and 3 h of reaction time.

(a)

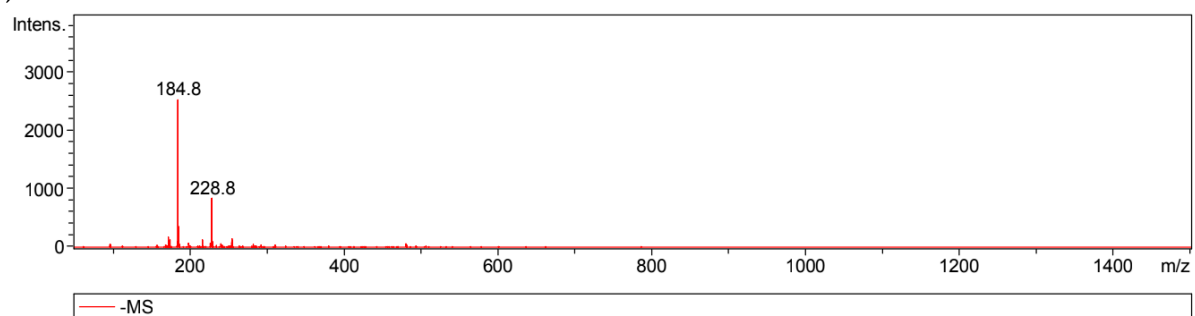

(b)

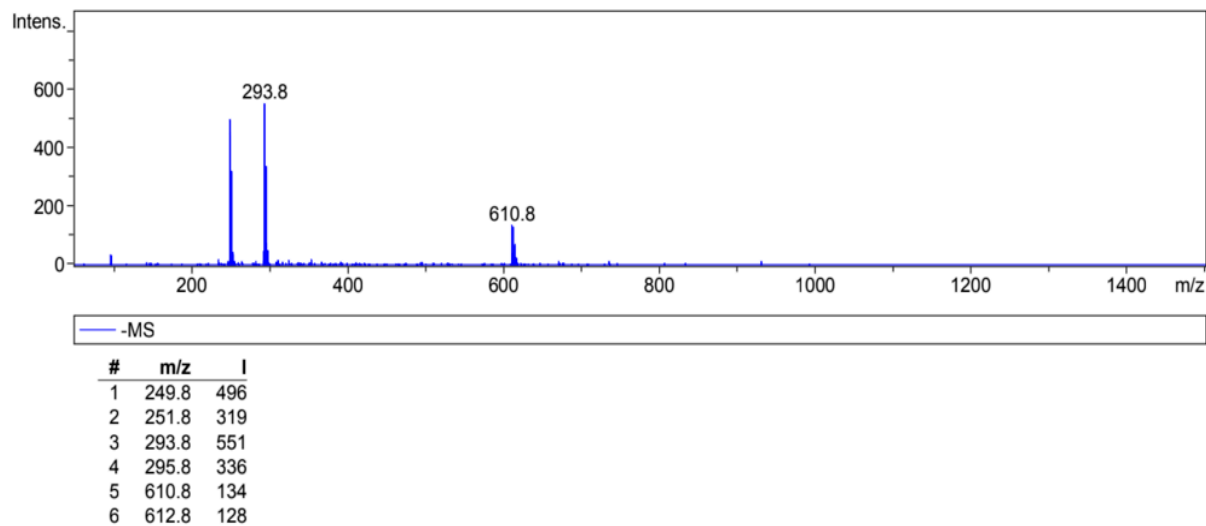

Figure S7. Characteristic peaks of the a) NAP and b) DCF Standards



**Table S1.** *p*-test significance of model terms in the NAP quadratic polynomial model.

| Model          | Model coefficient | Coefficient estimate | Standard error | T Stat | P Value | Degree of significance |
|----------------|-------------------|----------------------|----------------|--------|---------|------------------------|
| Intercept      | $\beta_0$         | 10.57                | 0.40           | 26.20  | <0.00   | Significant            |
| A              | $\beta_1$         | 1.55                 | 0.25           | 6.28   | 0.002   | Significant            |
| B              | $\beta_2$         | 2.53                 | 0.25           | 10.23  | <0.00   | Significant            |
| C              | $\beta_3$         | -5.79                | 0.25           | -23.44 | <0.00   | Significant            |
| A <sup>2</sup> | $\beta_{11}$      | 0.27                 | 0.36           | -0.76  | 0.483   | Not significant        |
| B <sup>2</sup> | $\beta_{22}$      | 1.91                 | 0.36           | 5.25   | 0.003   | Significant            |
| C <sup>2</sup> | $\beta_{33}$      | -0.67                | 0.36           | -1.84  | 0.125   | Not significant        |
| AB             | $\beta_{12}$      | 0.75                 | 0.35           | 2.15   | 0.084   | Significant            |
| AC             | $\beta_{13}$      | -1.56                | 0.35           | -4.47  | 0.007   | Significant            |
| BC             | $\beta_{23}$      | 1.30                 | 0.35           | 3.73   | 0.013   | Significant            |

**Table S2.** *p*-test significance of model terms in DCF quadratic polynomial model.

| Model          | Model coefficient | Coefficient estimate | Standard error | T Stat | P Value | Degree of significance |
|----------------|-------------------|----------------------|----------------|--------|---------|------------------------|
| Intercept      | $\beta_0$         | 31.37                | 1.018          | 30.96  | <0.00   | Significant            |
| A              | $\beta_1$         | 4.63                 | 0.62           | 7.47   | 0.001   | Significant            |
| B              | $\beta_2$         | 5.28                 | 0.62           | 8.51   | <0.00   | Significant            |
| C              | $\beta_3$         | -17.55               | 0.62           | -28.29 | <0.00   | Significant            |
| A <sup>2</sup> | $\beta_{11}$      | 2.09                 | 0.91           | 2.28   | 0.071   | Significant            |
| B <sup>2</sup> | $\beta_{22}$      | 5.12                 | 0.91           | 5.60   | 0.003   | Significant            |
| C <sup>2</sup> | $\beta_{33}$      | -2.54                | 0.91           | -2.78  | 0.039   | Significant            |
| AB             | $\beta_{12}$      | 2.43                 | 0.87           | 2.77   | 0.039   | Significant            |
| AC             | $\beta_{13}$      | -5.08                | 0.87           | -5.79  | 0.002   | Significant            |
| BC             | $\beta_{23}$      | 2.89                 | 0.87           | 3.29   | 0.022   | Significant            |

**Table S3.** Intermediates compounds of NAP decomposition in catalytic wet peroxide oxidation with Fe<sub>3</sub>O<sub>4</sub>/MWCNTs.

| Ion m/z detected<br>by ESI-ms                                     | Molecular<br>weight | w/z (negative)     | Chemical structure |
|-------------------------------------------------------------------|---------------------|--------------------|--------------------|
| C1 (C <sub>14</sub> H <sub>13</sub> O <sub>3</sub> ) <sup>-</sup> | 230                 | 228.8              |                    |
| C2 (C <sub>14</sub> H <sub>17</sub> O <sub>4</sub> ) <sup>-</sup> | 251                 | 249.8 <sup>1</sup> |                    |
| C3 (C <sub>12</sub> H <sub>13</sub> O <sub>3</sub> ) <sup>-</sup> | 206                 | 204.6 <sup>1</sup> |                    |
| C4 (C <sub>9</sub> H <sub>9</sub> O <sub>2</sub> ) <sup>-</sup>   | 151                 | 149.8 <sup>1</sup> |                    |
| C5 (C <sub>13</sub> H <sub>15</sub> O) <sup>-</sup>               | 186                 | 186.8              |                    |
| C6 (C <sub>13</sub> H <sub>13</sub> O) <sup>-</sup>               | 184                 | 184.9              |                    |
| C7 (C <sub>13</sub> H <sub>13</sub> O <sub>3</sub> ) <sup>-</sup> | 218                 | 216.7              |                    |
| C8 (C <sub>13</sub> H <sub>13</sub> O <sub>2</sub> ) <sup>-</sup> | 200                 | 200.9              |                    |
| C9 (C <sub>10</sub> H <sub>7</sub> O <sub>3</sub> ) <sup>-</sup>  | 176                 | 175                |                    |
| C10 (C <sub>10</sub> H <sub>7</sub> O <sub>5</sub> ) <sup>-</sup> | 208                 | 207                |                    |
| C11 (C <sub>4</sub> H <sub>3</sub> O <sub>6</sub> ) <sup>-</sup>  | 148                 | 147                |                    |
| C12 (C <sub>9</sub> H <sub>10</sub> O <sub>6</sub> ) <sup>-</sup> | 214                 | 213                |                    |
| C13 (C <sub>5</sub> H <sub>4</sub> O <sub>4</sub> ) <sup>-</sup>  | 130                 | 128.9              |                    |
| C14 (C <sub>4</sub> H <sub>6</sub> O <sub>3</sub> )               | 102                 | 101                |                    |

**Table S4.** Intermediates compounds of DCF degradation in catalytic wet peroxide oxidation with Fe<sub>3</sub>O<sub>4</sub>/MWCNTs.

| Ion m/z detected by ESI-ms                                                          | Molecular weight | w/z (negative) | Chemical structure                                                                    |
|-------------------------------------------------------------------------------------|------------------|----------------|---------------------------------------------------------------------------------------|
| C1 (C <sub>14</sub> H <sub>10</sub> NCl <sub>2</sub> O <sub>2</sub> ) <sup>-</sup>  | 295              | 293.8          | 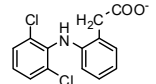   |
| C2 (C <sub>14</sub> H <sub>10</sub> NCl <sub>2</sub> O <sub>3</sub> ) <sup>-</sup>  | 311.9            | 311            |    |
| C3 (C <sub>14</sub> H <sub>9</sub> NCl <sub>2</sub> O <sub>3</sub> ) <sup>-</sup>   | 310              | 309            |    |
| C4 (C <sub>13</sub> H <sub>9</sub> ClNO) <sup>-</sup>                               | 230.6            | 229.8          |    |
| C5 (C <sub>14</sub> H <sub>10</sub> NCl <sub>2</sub> O <sub>7</sub> ) <sup>-</sup>  | 376              | 375            |    |
| C6 (C <sub>13</sub> H <sub>10</sub> NCl <sub>2</sub> O <sub>7</sub> ) <sup>-</sup>  | 366              | 364            |    |
| C7 (C <sub>13</sub> H <sub>8</sub> NCl <sub>2</sub> O <sub>7</sub> ) <sup>-</sup>   | 364              | 362            |   |
| C8 (C <sub>6</sub> H <sub>7</sub> O <sub>6</sub> ) <sup>-</sup>                     | 175              | 172.9          |  |
| C9 (C <sub>14</sub> H <sub>10</sub> Cl <sub>3</sub> N O <sub>2</sub> ) <sup>-</sup> | 330              | 329.1          |  |
| C10 (C <sub>13</sub> H <sub>8</sub> Cl <sub>3</sub> N) <sup>-</sup>                 | 286              | 284            |  |
| C11 (C <sub>13</sub> H <sub>10</sub> NCl <sub>2</sub> ) <sup>-</sup>                | 251              | 249.8          |  |
| C12 (C <sub>13</sub> H <sub>10</sub> Cl <sub>3</sub> NO) <sup>-</sup>               | 301              | 299.1          |  |
| C13 (C <sub>6</sub> H <sub>4</sub> NCl <sub>2</sub> ) <sup>-</sup>                  | 162              | 160.8          |  |
| C14 (C <sub>14</sub> H <sub>9</sub> Cl <sub>2</sub> NO) <sup>-</sup>                | 278.13           | 277            |  |
| C15 (C <sub>12</sub> H <sub>14</sub> O <sub>4</sub> ) <sup>-</sup>                  | 222.24           | 220.8          |  |
| C16 (C <sub>7</sub> H <sub>8</sub> O <sub>7</sub> ) <sup>-</sup>                    | 204              | 201            |  |

**Table S5.** Representative analysis of the three real aqueous matrices.

|                                         | Hospital water | Surface water | WWTP effluent |
|-----------------------------------------|----------------|---------------|---------------|
| <b>pH</b>                               | 8.6            | 6.1           | 9.4           |
| <b>Conductivity (mS/cm<sup>2</sup>)</b> | 1.17           | 0.1641        | 0.557         |
| <b>TOC (mg/L)</b>                       | 80             | 6.8           | 9.8           |
| <b>Suspended solids (mg/L)</b>          | 138            | 140           | 80            |
| <b>Aromaticity (a.u)</b>                | 0.50           | 0.16          | 0.12          |
| <b>TN (mg/L)</b>                        | 94             | 0.98          | 0.87          |

**Table S6.** Microbiological counts of the three real aqueous matrices and their CWPO effluents.

| Microbiological counts (Log CFU/mL) |                                        |                   |                 |                  |                         |                    |                  |                        |
|-------------------------------------|----------------------------------------|-------------------|-----------------|------------------|-------------------------|--------------------|------------------|------------------------|
| 1                                   | Real aqueous Matrix                    | Enterococcus spp. | Total coliforms | Escherichia coli | Clostridium perfringens | Aerobic mesophilic | Molds and yeasts | Pseudomonas aeruginosa |
| 2                                   | SW                                     | ND                | ND              | ND               | 2.00±0.08               | 5.44±0.13          | 3.90±0.03        | ND                     |
| 3                                   | WWTP                                   | ND                | ND              | ND               | 2.48±0.08               | 5.15±0.05          | ND               | ND                     |
| 4                                   | HW                                     | 5.23±0.51         | ND              | ND               | 1.85±0.02               | 5.45±0.15          | 5.57±0.11        | ND                     |
| 5                                   | SW-NAP-DCF                             | ND                | ND              | ND               | 2.48±0.14               | 4.77±0.05          | ND               | ND                     |
| 6                                   | WWTP-NAP-DCF                           | ND                | ND              | ND               | 2.48±0.04               | 1.00±0.01          | ND               | ND                     |
| 7                                   | HW-NAP-DCF                             | 2.76±0.06         | 1.10±0.02       | ND               | 1.30±0.03               | 5.46±0.09          | ND               | ND                     |
| 8                                   | CWPO Effluent of SW after 3h           | ND                | ND              | ND               | 1.30±0.09               | 1.48±0.02          | 4.60±0.05        | ND                     |
| 9                                   | CWPO Effluent of WWTP after 3h         | ND                | ND              | ND               | 1.48±0.05               | 2.00±0.04          | ND               | ND                     |
| 10                                  | CWPO Effluent of HW after 3h           | ND                | ND              | ND               | 1.30                    | ND                 | ND               | ND                     |
| 11                                  | CWPO Effluent of SW-NAP-DCF after 8h   | 1.48±0.03         | ND              | ND               | 2.78±0.09               | 3.83±0.06          | 3.51±0.07        | ND                     |
| 12                                  | CWPO Effluent of WWTP-NAP-DCF after 8h | ND                | ND              | ND               | ND                      | ND                 | ND               | ND                     |
| 13                                  | CWPO Effluent of HW-NAP-DCF after 8h   | ND                | ND              | ND               | ND                      | ND                 | ND               | ND                     |
